# Supplementary material
Source: ML conference proceedings conference paper supplement (https://openreview.net/forum?id=38ioKDbyP7)

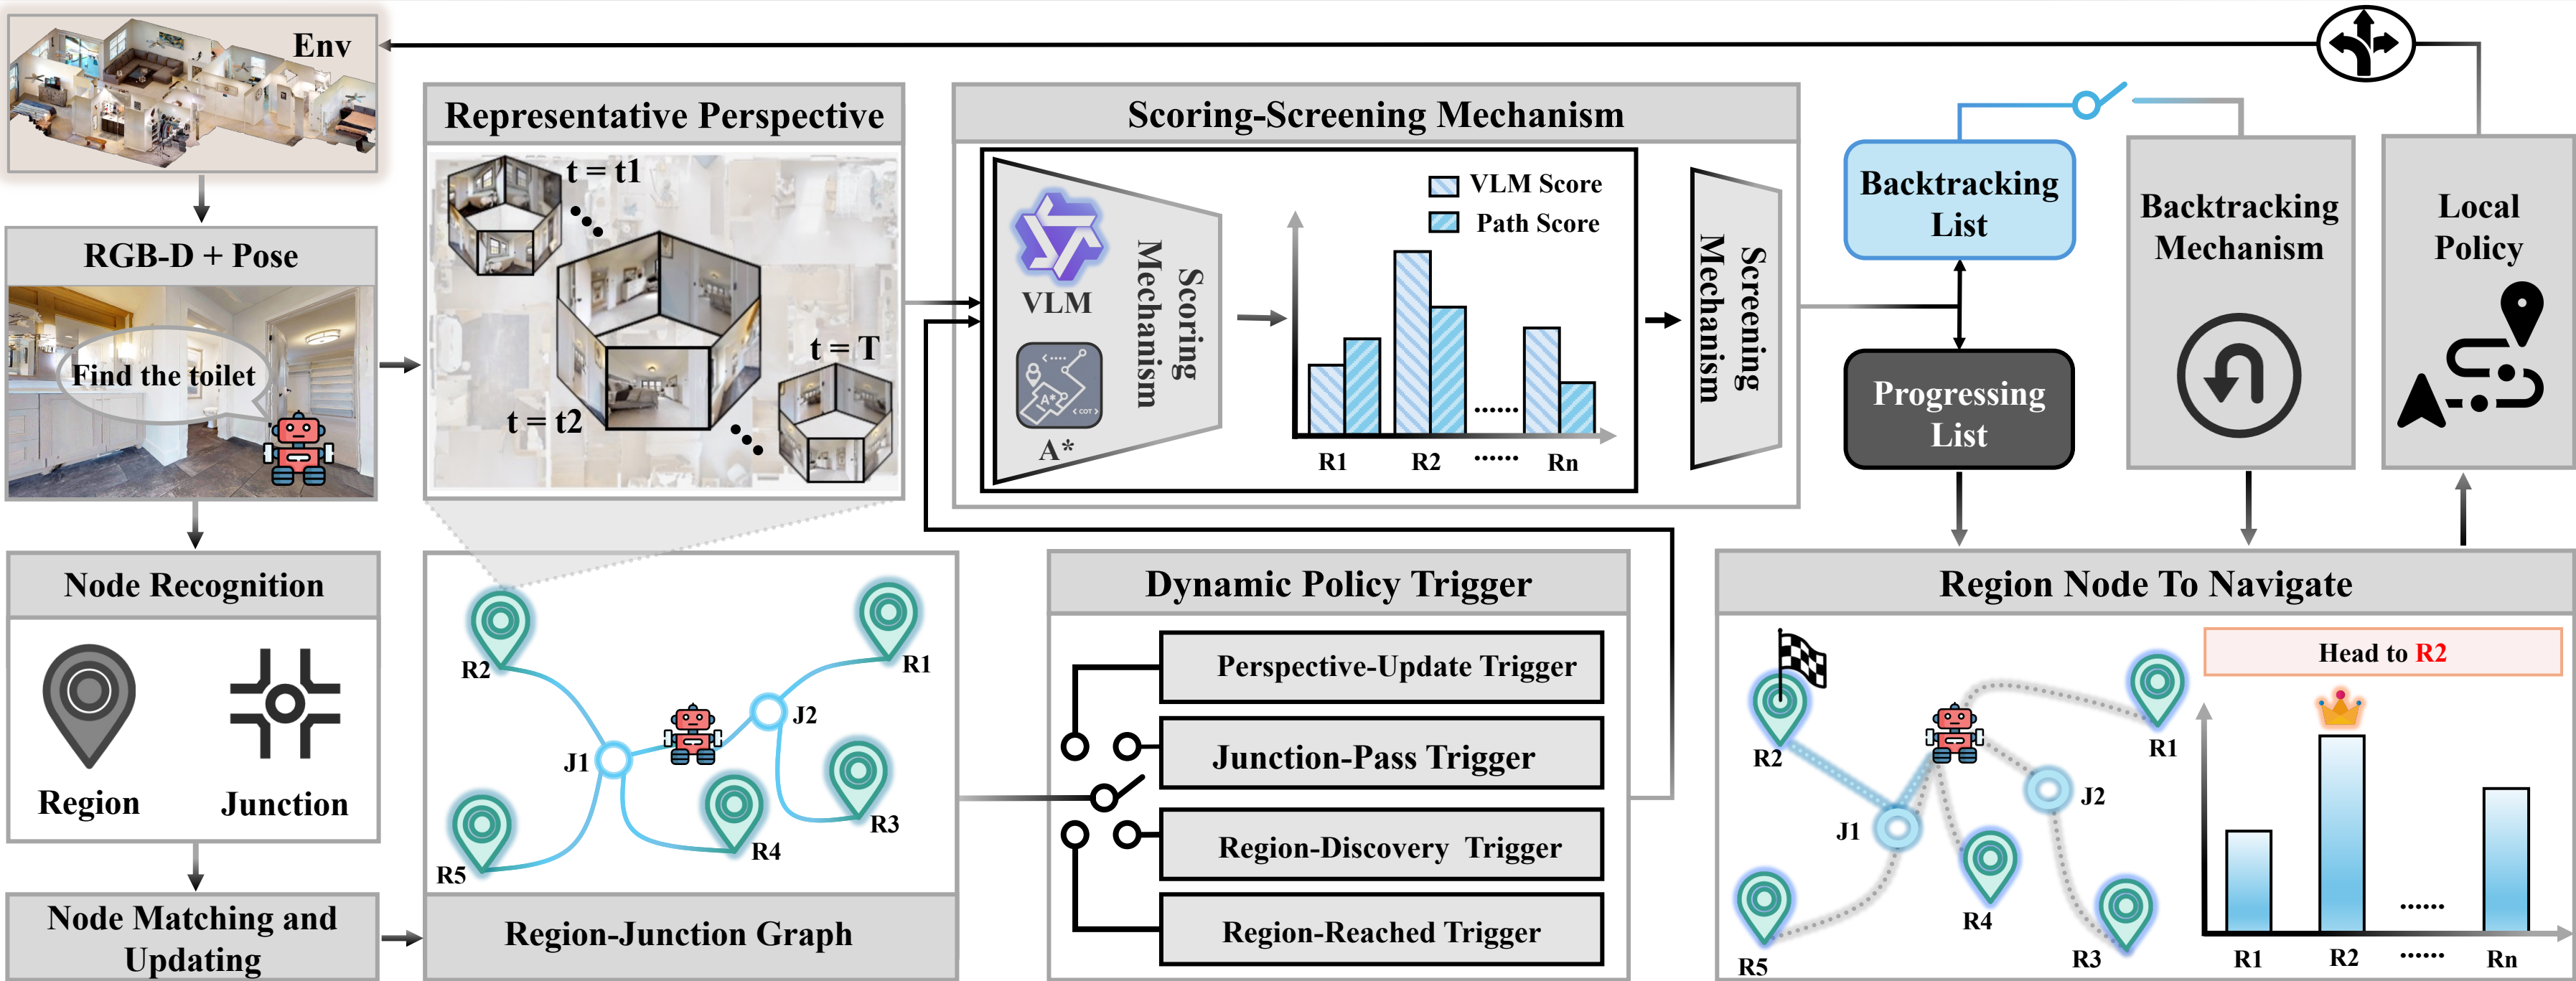

Supplement: supplementary_material [file framework.pdf › Supplementary_Materials_of_DP-Nav_ICLR2026Submission/code_of_DPNav/framework.pdf]
